# Supplementary material
Source: publisher site journal article supplement (https://www.dovepress.com/article/267307)
Supplement: Supplementary file 1 [file get_supplementary_file.php]

**Supplementary material**

Table 1: Bi-variate analysis outcomes to make the selection of variables to enter multivariable logistic regression analysis of post-traumatic stress disorder among internally displaced people in south Ethiopia (n=625).

| Explanatory variables | PTSD | | COR(95%CI) | P-value |
| --- | --- | --- | --- | --- |
| Yes | No |
| Age 15-25  26-35  36-45  46-55  >55 | 70  94  70  9  8 | 106  100  108  40  20 | 1.65( 0.688, 3.951)  2.35(0.987, 5.59)  1.62(0.676, 3.877)  0.56(0.333, 5.329 )  1 | 0.32  0.27  0.45  0.37  1 |
| Sex  Female  Male | 223  142 | 75  185 | 3.87 ( 2.84, 5.37)  1 | 0.03*  1 |
| Co-morbid medical illness  Yes  No | 61  305 | 31  228 | 1.47 (0.95, 2.25)  1 | 0.04*  1 |
| Education status  No formal education  Primary  Secondary  Preparatory  College and above | 38  90  20  15  4 | 100  206  96  46  10 | 0.95(0.446, 2.026)  1.09(0.333, 3.568)  0.52(0.148, 1.826)  0.81(0.221, 2.966)  1 | 0.34  0.57  0.24  0.52  1 |
| Occupation  Farmer  Merchant  Student  Others*  Employed (gov’t and private) | 102  78  42  10  20 | 150  100  72  16  35 | 1.19(0.651, 2.177)  1.37(0.734, 2.557)  1.02(0.523, 1.99)  1.09(1.842, 2.852)  1 | 0.69  0.71  0.38  0.53  1 |
| Ever treated for mental illness  Yes  No | 10  96 | 19  500 | 2.74(1.236, 6.074)  1 | 0.24  1 |
| Family member treated for mental illnes  Yes  No | 16  90 | 20  499 | 4.43(2.21, 8.873)  1 | 0.41  1 |
| Co-morbid medical or surgical illness  Yes  No | 55  43 | 113  414 | 4.68(2.974, 7.316)  1 | 0.36  1 |
| Depression  Yes  No | 228  137 | 105  155 | 2.46 (2.083, 2.904)  1 | 0.02*  1 |
| Prior displacement characteristics  Never displaced  Displaced as IDPs  Displaced as refugee  Displaced as IDP and refugee | 114  150  2  1 | 250  103  4  1 | 1  3.19(2.28, 4.459)  1.19(0.215, 6.593)  2.19(0.136, 35.34) | 1  0.29  0.55  0.47 |
| Duration since displacement  9-12 month  >12 month | 283  65 | 197  80 | 1.77(1.22, 2.573)  1 | 0.31  1 |
| Frequency of displacement  >one time  Once | 211  155 | 51  208 | 5.55 (3.97, 7.89)  1 | 0.06*  1 |
| Social support  Poor  Moderate  Strong | 200  80  33 | 136  106  70 | 3.12(1.954, 4.983)  1.6(0.965, 2.654)  1 | 0.28  0.25  1 |
| Life time use of alcohol  Yes  No | 50  31 | 144  400 | 4.48(3.497, 5.743)  1 | 0.59  1 |
| Life time use of chat  Yes  No | 63  49 | 113  400 | 4.65(2.92, 6.89)  1 | 0.33  1 |
| Life time use of tobacco  Yes  No | 18  40 | 60  507 | 3.8(2.05, 7.04)  1 | 0.63  1 |
| Current use of chat  Yes  No | 43  47 | 82  453 | 5.76(3.575, 9.263)  1 | 0.57  1 |
| Current use of tobacco  Yes  No | 7  104 | 14  500 | 2.4(1.492, 3.857)  1 | 0.77  1 |
| Destruction of personal property  Yes  No | 267  101 | 158  100 | 1.67 (1.26, 2.37)  1 | 0.12*  1 |
| Lack of food and water  Yes  No | 246  120 | 136  123 | 1.85 (1.37, 2.51)  1 | 0.16*  1 |
| Witnessing murder of family/friends  Yes  No | 231  135 | 117  142 | 2.08 (1.54, 2.81)  1 | 0.09*  1 |
| Ill without medical care  Yes  No | 202  163 | 114  146 | 1.59 (1.18, 2.14)  1 | 0.18*  1 |
| Forced isolation from other people  Yes  No | 70  46 | 120  389 | 4.93(3.225, 7.546)  1 | 0.39  1 |
| Tortured or beaten  Yes  No | 189  176 | 104  156 | 1.61 (1.20, 2.18)  1 | 0.07*  1 |
| Serious injury  Yes  No | 170  78 | 120  297 | 5.39(3.83, 7.59)  1 | 0.51  1 |
| Witnessing murder of stranger  Yes  No | 125  75 | 125  300 | 4(2.807, 5.697)  1 | 0.27  1 |
| Made to accept ideas against will  Yes  No | 58  29 | 140  398 | 5.59(3.442, 9.088)  1 | 0.68  1 |
| Forced separation from family  Yes  No | 45  35 | 145  400 | 3.54( 2.188, 5.726)  1 | 0.35  1 |
| Unnatural death of family or friends  Yes  No | 70  67 | 108  380 | 3.71(2.494, 5.518)  1 | 0.28  1 |
| Imprisonment against your will  Yes  No | 46  150 | 120  309 | 0.79(0.534, 1.169)  1 | 0.52  1 |
| Being in a war fighting situation  Yes  No | 93  96 | 69  367 | 5.2(3.543, 7.637)  1 | 0.39  1 |
| Being abducted or kidnapped  Yes  No | 86  206 | 28  305 | 4.54(2.861, 7.207)  1 | 0.73  1 |
| Rape or sexual abuse  Yes  No | 29  127 | 19  450 | 5.4(2.93, 9.944 )  1 | 0.42  1 |
| Childhood physical abuse/neglected  Yes  No | 107  168 | 50  400 | 5.09(3.476, 7.448)  1 | 0.63  1 |
| Cumulative trauma  4-7  8-11  12-16  0-3 | 39  156  33  137 | 21  63  6  170 | 2.3 (1.32, 3.99)  3.07 (2.18, 4.33)  6.82 (3.01, 15.85)  1 | 0.16*  0.07*  0.01*  1 |

*P value <2 , COR= Crude Odds Ratio, CI=Confidence Interval
